# Supplementary material for: Predicting student dropout in Saudi Universities using machine learning and explainable AI
Source: PeerJ journal article supplement (doi:10.7717/peerj-cs.3490), 2026-01-27
Supplement: Questionnaire.pdf [file Questionnaire.pdf]

# Predicting Student Dropout with Machine Learning and Explainable AI: A Case Study of Saudi Universities

Dear Participant, thank you for your interest in taking part in this survey.

This study aims to predict student dropout in Saudi universities and understand the reasons behind it using Artificial Intelligence and Machine Learning techniques.

## Informed Consent

By proceeding with the survey, you indicate your consent to participate in this study.

### Please note that:

- Participation in this survey is entirely voluntary.
- No personal identifying information (such as your name or contact details) will be collected.
- All responses will remain strictly confidential and will be used for research purposes only.
- You may withdraw from participation at any time without any consequences.

Thank you for your support and cooperation.

عزيزتي/عزيزي المشارك، نشكر لك رغبتك في المشاركة في هذه الاستبانة

يهدف هذا البحث إلى التنبؤ بانسحاب الطلاب في الجامعات السعودية وفهم أسباب انسحابهم باستخدام تقنيات الذكاء الاصطناعي وتعلم الآلة.

### موافقتك على المشاركة

من خلال متابعتك للإجابة على الاستبانة، فإنك تقر بموافقتك على المشاركة في هذا البحث.

### ونود أن نوضح لك التالي:

المشاركة في هذه الاستبانة -  
اختيارية بالكامل.

لن يتم جمع أي -  
معلومات شخصية مثل الاسم أو وسائل التواصل.

جميع البيانات -  
ستستخدم لأغراض بحثية فقط وبشكل سري تماماً.

يمكنك التوقف عن -

المشاركة في أي وقت دون أي تبعات

شكراً لدعمكم وتعاونكم

\* Indicates required question

---

### Preliminary Question

1. \* هل انسحبت من الجامعة من قبل؟ / Have you ever dropped out from University?

Mark only one oval.

☐ Yes / نعم Skip to question 2

☐ No / لا Skip to question 32

### Dropped-Out Students

2. \* الجنس: / Gender?

Mark only one oval.

☐ Male / ذكر

☐ Female / أنثى

3. \* العمر عند الانسحاب / Age when dropped out?

Mark only one oval.

☐ 18 - 25

☐ 26 - 33

☐ 34 - 41

☐ Above 41 / فوق ٤١

## 4. Employment Status when dropped out / الحالة الوظيفية عند الانسحاب \*

Mark only one oval.

- ☐ Employed full-time / موظف بدوام كامل
- ☐ Employed part-time / موظف بدوام جزئي
- ☐ Own business / لدي عمل خاص
- ☐ Unemployed / غير موظف

## 5. Marital Status when dropped out / الحالة الاجتماعية عند الانسحاب \*

Mark only one oval.

- ☐ Single / أعزب
- ☐ Married / متزوج

## 6. In what year did you dropout / في أي سنة تم انسحابك \*

Mark only one oval.

- ☐ First Year / السنة الأولى
- ☐ Second Year / السنة الثانية
- ☐ Third Year / السنة الثالثة
- ☐ Above Third Year / ما بعد السنة الثالثة

## 7. Dropped out University Name / \* :اسم جامعتك التي انسحبت منها

Dropdown

*Mark only one oval.*

- ☐ KAU / جامعة الملك عبدالعزيز
- ☐ KSU / جامعة الملك سعود
- ☐ KSAU-HS / جامعة الملك سعود بن عبدالعزيز للعلوم الصحية
- ☐ KFUPM / جامعة الملك فهد للبترول والمعادن
- ☐ KAUST / جامعة الملك عبدالله للعلوم والتقنية
- ☐ King Faisal University / جامعة الملك فيصل
- ☐ PNU / جامعة الأميرة نورة بنت عبدالرحمن
- ☐ IAU / جامعة الإمام عبدالرحمن بن فيصل
- ☐ IMSIU / جامعة الإمام محمد بن سعود الإسلامية
- ☐ PSAU / جامعة الأمير سطام بن عبدالعزيز
- ☐ UJ / جامعة جدة
- ☐ KKU / جامعة الملك خالد
- ☐ UQU / جامعة أم القرى
- ☐ TU / جامعة الطائف
- ☐ NU / جامعة نجران
- ☐ JazanU / جامعة جازان
- ☐ UoH / جامعة حائل
- ☐ JU / جامعة الجوف
- ☐ NBU / جامعة الحدود الشمالية
- ☐ MU / جامعة المجمعة
- ☐ BU / جامعة الباحة
- ☐ SEU / الجامعة السعودية الإلكترونية
- ☐ SU / جامعة شقراء
- ☐ UOHB / جامعة حفر الباطن
- ☐ TaibahU / جامعة طيبة
- ☐ TABU / جامعة تبوك
- ☐ UB / جامعة بيشة
- ☐ QU / جامعة القصيم
- ☐ JIC \ جامعة الجبيل الصناعية
- ☐ Private University / جامعة خاصة

☐ Others / أخرى

8. If your university is not mentioned in the previous question, write the name of your university / اذا لم تكن جامعتك المذكورة بالسؤال السابق، اكتب لنا اسم جامعتك :

---

9. Dropped out Faculty Name / اسم الكلية التي انسحبت منها \*

⌵ Dropdown

Mark only one oval.

- ☐ Preparatory year / السنة التحضيرية
- ☐ College of CS and IT / كلية علوم الحاسب وتقنية المعلومات
- ☐ Economics & Administrative Sciences / كلية الاقتصاد والعلوم الإدارية
- ☐ College of Business Administration / كلية إدارة الأعمال
- ☐ College of Medicine / كلية الطب
- ☐ College of Dentistry / كلية طب الأسنان
- ☐ College of Arts & Sciences / كلية الآداب والعلوم
- ☐ College of Engineering / كلية الهندسة
- ☐ College of Languages and Translation / كلية اللغات والترجمة
- ☐ College of Communication & Media / كلية الاتصال والإعلام
- ☐ College of Nursing / كلية التمريض
- ☐ College of Pharmacy / كلية الصيدلة
- ☐ College of Education / كلية التربية
- ☐ College of Law / كلية القانون
- ☐ College of Architecture & Planning / كلية العمارة والتخطيط
- ☐ College of Applied Medical Sciences / كلية العلوم الطبية التطبيقية
- ☐ Social Sciences & Humanities / كلية العلوم الاجتماعية والإنسانية
- ☐ Public Health & Health Info / كلية الصحة العامة والمعلومات الصحية
- ☐ CASCs / كلية الدراسات التطبيقية وخدمة المجتمع
- ☐ COVAB / كلية الطب البيطري وموارد الحيوان
- ☐ College of Agriculture & Food Sciences / كلية الزراعة وعلوم الطعام
- ☐ Others / أخرى

10. If your faculty is not mentioned in the previous question, write the name of your faculty / اذا لم تكن كليتك مذكورة بالسؤال السابق، اكتب لنا اسم كليتك

---

11. Dropped out Program Type / نوع البرنامج الدراسي الذي انسحبت منه \*  Dropdown

Mark only one oval.

- ☐ Free Diploma / دبلوم مجاني
- ☐ Diploma with fees / دبلوم برسوم
- ☐ Free Bachelor / بكالوريوس مجاني
- ☐ Bachelor with fees / بكالوريوس برسوم
- ☐ Free Master's / ماجستير مجاني
- ☐ Master's with fees / ماجستير برسوم
- ☐ Free PHD / دكتوراة مجاني
- ☐ PHD with fees / دكتوراة برسوم

12. If your program type is not mentioned in the previous question, write the name of your program / اذا لم يكن نوع البرنامج مذكور بالسؤال السابق، اكتب لنا اسم برنامجك

---

13. What was your GPA when you dropped out / ما هو معدل التراكمي عند الانسحاب؟ \*

Mark only one oval.

- ☐ Excellent / ممتاز
- ☐ Very Good / جيد جداً
- ☐ Good / جيد
- ☐ Pass / مقبول
- ☐ GPA is not showing yet / لم يظهر المعدل بعد

14. How many subjects did you fail in the stage you dropout from / كم عدد المواد التي رسبت بها في المرحلة التي انسحبت منها فقط؟ \*
- Mark only one oval.
- ☐ 0
- ☐ 1 - 2
- ☐ 3 - 4
- ☐ More than 4 / أكثر من ٤
15. Have you received any academic warnings before dropping out / هل حصلت على إنذارات قبل انسحابك؟ \*
- Mark only one oval.
- ☐ Yes / نعم
- ☐ No / لا
16. Was the major you dropped out of difficult for you / هل كان التخصص الذي انسحبت منه صعباً بالنسبة لك؟ \*
- Mark only one oval.
- ☐ Yes / نعم
- ☐ No / لا
17. Are you satisfied with the university environment and instruction method in your university / هل أنت راضي عن البيئة الجامعية وطريقة التدريس في جامعتك؟ \*
- Mark only one oval.
- ☐ Satisfied / راضي
- ☐ Dissatisfied / غير راضي



18. If not satisfied, what were the reasons / اذا كنت غير راضي، ماذا كانت الاسباب؟

---

19. Did you study in a language other than Arabic / هل كانت دراستك بلغة غير اللغة العربية؟ \*

Mark only one oval.

☐ Yes / نعم

☐ No / لا

20. Do you think that language differences can pose a difficulty for students / هل تعتقد ان اختلاف اللغة قد يشكل صعوبة للطلاب؟ \*

Mark only one oval.

☐ Yes / نعم

☐ No / لا

21. Did you research the major you dropped out of and know its career prospects before choosing it / هل قمت بالبحث عن التخصص الذي انسحبت منه ومعرفة مستقبله الوظيفي قبل اختياره؟ \*

Mark only one oval.

☐ Yes / نعم

☐ No / لا

22. Were you influenced by the choices of your friends or peers when choosing your major / هل تأثرت باختيارات اصدقائك او اقرانك عند اختيار تخصصك؟ \*

Mark only one oval.

☐ Yes / نعم

☐ No / لا

23. Have you been pressured by (your family, employer, or others) to study your major or obtain your qualification, which led to your dropout or affected your academic achievement / هل تم الضغط عليك من قبل (عائلتك، أو جهة العمل، أو غيرهم) لدراسة / تخصصك أو الحصول على مؤهلك مما أدى الى انسحابك أو اثر على تحصيلك الدراسي؟ \*

Mark only one oval.

☐ Yes / نعم

☐ No / لا

24. Were societal expectations (such as preferences for specific majors or qualifications) a factor in your choice of major, which led to your dropout or affected your academic achievement / هل كانت توقعات المجتمع (مثل تفضيل تخصصات / معينة أو مؤهلات معينة) سبباً في اختيارك لتخصصك مما أدى الى انسحابك أو اثر على تحصيلك الدراسي؟ \*

Mark only one oval.

☐ Yes / نعم

☐ No / لا

25. Did you move to another city to study / هل انتقلت الى مدينة أخرى لغرض الدراسة؟ \*

Mark only one oval.

☐ Yes / نعم

☐ No / لا

26. Did you have many commitments and face difficulties balancing them with your studies / هل كانت لديك التزامات كثيرة وتواجه صعوبات في الموازنة بينها وبين دراستك؟ \*

Mark only one oval.

☐ Yes / نعم

☐ No / لا

27. Were you facing difficulties in covering living expenses (such as food, drink, transportation, and housing) / هل كنت تواجه صعوبات في دفع نفقات المعيشة (مثل الاكل، الشرب، المواصلات، والمسكن)؟ \*

Mark only one oval.

☐ Yes / نعم

☐ No / لا

28. Did you receive enough moral support from your family and friends during your studies / هل تلقيت الدعم المعنوي الكافي من عائلتك واصدقائك خلال فترة دراستك؟ \*

Mark only one oval.

☐ Yes

☐ No

29. Did you face any psychological issues that were one of the reasons for your dropout / هل واجهت أي مشاكل (نفسية) وكانت احد اسباب انسحابك؟ \*

Mark only one oval.

☐ Yes / نعم

☐ No / لا

30. Did you face any health issues that were one of the reasons for your dropout / هل واجهت أي مشاكل (صحية) وكانت احد اسباب انسحابك؟ \*

Mark only one oval.

☐ Yes / نعم

☐ No / لا

31. If other reasons led to your dropout, mention them in the following text box / اذا كانت توجد اسباب اخرى ادت الى انسحابك اذكرها في مربع النص التالي

---

## Non-Dropped-Out Students

32. Gender / الجنس: \*

Mark only one oval.

☐ Male / ذكر

☐ Female / أنثى

33. Age during study / العمر اثناء الدراسة: \*

Mark only one oval.

☐ 18 - 25

☐ 26 - 33

☐ 34 - 41

☐ Above 41 / فوق ٤١

34. Employment status during study / الحالة الوظيفية اثناء الدراسة: \*

Mark only one oval.

☐ Employed full-time / موظف بدوام كامل

☐ Employed part-time / موظف بدوام جزئي

☐ Own business / لدي عمل خاص

☐ Unemployed / غير موظف

35. Marital Status during study / الحالة الاجتماعية اثناء الدراسة: \*

Mark only one oval.

☐ Single / اعزب

☐ Married / متزوج

36. What year are you in now / في أي سنة انت الان \*

*Mark only one oval.*

- ☐ First Year / السنة الأولى
- ☐ Second Year / السنة الثانية
- ☐ Third Year / السنة الثالثة
- ☐ Above Third Year / ما بعد السنة الثالثة
- ☐ Graduated / متخرج

37. University Name / اسم جامعتك \*

Dropdown

Mark only one oval.

- ☐ KAU / جامعة الملك عبدالعزيز
- ☐ KSU / جامعة الملك سعود
- ☐ KSAU-HS / جامعة الملك سعود بن عبدالعزيز للعلوم الصحية
- ☐ KFUPM / جامعة الملك فهد للبترول والمعادن
- ☐ KAUST / جامعة الملك عبدالله للعلوم والتقنية
- ☐ King Faisal University / جامعة الملك فيصل
- ☐ PNU / جامعة الأميرة نورة بنت عبدالرحمن
- ☐ IAU / جامعة الإمام عبدالرحمن بن فيصل
- ☐ IMSIU / جامعة الإمام محمد بن سعود الإسلامية
- ☐ PSAU / جامعة الأمير سطام بن عبدالعزيز
- ☐ UU / جامعة جدة
- ☐ KKU / جامعة الملك خالد
- ☐ UQU / جامعة أم القرى
- ☐ TU / جامعة الطائف
- ☐ NU / جامعة نجران
- ☐ JazanU / جامعة جازان
- ☐ UoH / جامعة حائل
- ☐ JU / جامعة الجوف
- ☐ NBU / جامعة الحدود الشمالية
- ☐ MU / جامعة المجمعة
- ☐ BU / جامعة الباحة
- ☐ SEU / الجامعة السعودية الإلكترونية
- ☐ SU / جامعة شقراء
- ☐ UOHB / جامعة حفر الباطن
- ☐ TaibahU / جامعة طيبة
- ☐ TABU / جامعة تبوك
- ☐ UB / جامعة بيشة
- ☐ QU / جامعة القصيم
- ☐ JIC / جامعة الجبيل الصناعية
- ☐ Private University / جامعة خاصة

☐ Others / أخرى

38. If your university is not mentioned in the previous question, write the name of your university / اذا لم تكن جامعتك المذكورة بالسؤال السابق، اكتب لنا اسم جامعتك:

---

39. Faculty Name / اسم الكلية \*

Dropdown

Mark only one oval.

- ☐ Preparatory year / السنة التحضيرية
- ☐ College of CS and IT / كلية علوم الحاسب وتقنية المعلومات
- ☐ Economics & Administrative Sciences / كلية الاقتصاد والعلوم الإدارية
- ☐ College of Business Administration / كلية إدارة الأعمال
- ☐ College of Medicine / كلية الطب
- ☐ College of Dentistry / كلية طب الأسنان
- ☐ College of Arts & Sciences / كلية الآداب والعلوم
- ☐ College of Engineering / كلية الهندسة
- ☐ College of Languages and Translation / كلية اللغات والترجمة
- ☐ College of Communication & Media / كلية الاتصال والإعلام
- ☐ College of Nursing / كلية التمريض
- ☐ College of Pharmacy / كلية الصيدلة
- ☐ College of Education / كلية التربية
- ☐ College of Law / كلية القانون
- ☐ College of Architecture & Planning / كلية العمارة والتخطيط
- ☐ College of Applied Medical Sciences / كلية العلوم الطبية التطبيقية
- ☐ Social Sciences & Humanities / كلية العلوم الاجتماعية والإنسانية
- ☐ Public Health & Health Info / كلية الصحة العامة والمعلومات الصحية
- ☐ CASCs / كلية الدراسات التطبيقية وخدمة المجتمع
- ☐ COVAB / كلية الطب البيطري وموارد الحيوان
- ☐ College of Agriculture & Food Sciences / كلية الزراعة وعلوم الطعام
- ☐ Others / أخرى

40. If your faculty is not mentioned in the previous question, write the name of your faculty / اذا لم تكن كليتك مذكورة بالسؤال السابق، اكتب لنا اسم كليتك

---

41. Current Program Type or Last Qualification / نوع البرنامج الدراسي / الحالي أو المؤهل الاخير

\*  Dropdown

Mark only one oval.

- ☐ Free Diploma / دبلوم مجاني
- ☐ Diploma with fees / دبلوم برسوم
- ☐ Free Bachelor / بكالوريوس مجاني
- ☐ Bachelor with fees / بكالوريوس برسوم
- ☐ Free Master's / ماجستير مجاني
- ☐ Master's with fees / ماجستير برسوم
- ☐ Free PHD / دكتوراة مجاني
- ☐ PHD with fees / دكتوراة برسوم

42. If your program type is not mentioned in the previous question, write the name of your program / اذا لم يكن نوع البرنامج مذكور بالسؤال السابق، اكتب لنا اسم برنامجك

---

43. What is your GPA / ما هو معدل التراكمي؟ \*

Mark only one oval.

- ☐ Excellent / ممتاز
- ☐ Very Good / جيد جداً
- ☐ Good / جيد
- ☐ Pass / مقبول
- ☐ GPA is not showing yet / لم يظهر المعدل بعد



44. \* كم عدد المواد التي رسبت بها في الجامعة؟ / How many courses did you fail at university ?

Mark only one oval.

- ☐ 0
- ☐ 1 - 2
- ☐ 3 - 4
- ☐ أكثر من 4 / More than 4

45. \* هل حصلت على إنذارات من قبل؟ / Have you received any academic warnings before ?

Mark only one oval.

- ☐ Yes / نعم
- ☐ No / لا

46. \* هل الدراسة في تخصصك صعبة بالنسبة لك؟ / Are studying at your major difficult for you ?

Mark only one oval.

- ☐ Yes / نعم
- ☐ No / لا

47. \* هل انت راضي عن البيئة الجامعية وطريقة التدريس في جامعتك؟ / Are you satisfied with the university environment and instruction method in your university ?

Mark only one oval.

- ☐ Satisfied / راضي
- ☐ Dissatisfied / غير راضي

48. اذا كنت غير راضي، ماذا كانت الاسباب؟ / If not satisfied, what were the reasons ?

---

49. Do you study in a language other than Arabic? / هل تدرس بلغة غير العربية؟ \*

Mark only one oval.

☐ Yes / نعم

☐ No / لا

50. Do you think that language differences can pose a difficulty for students / هل تعتقد ان اختلاف اللغة قد يشكل صعوبة للطلاب؟ \*

Mark only one oval.

☐ Yes / نعم

☐ No / لا

51. Did you research your chosen major and know its career prospects before choosing it / هل قمت بالبحث عن التخصص الذي اخترته ومعرفة مستقبله الوظيفي قبل اختياره؟ \*

Mark only one oval.

☐ Yes / نعم

☐ No / لا

52. Were you influenced by the choices of your friends or peers when choosing your major / هل تأثرت باختيارات اصدقائك او اقرانك عند اختيار تخصصك؟ \*

Mark only one oval.

☐ Yes / نعم

☐ No / لا

53. Have you been pressured by (your family, employer, or others) to study your major or obtain your qualification affected your academic achievement / هل تم الضغط عليك من قبل (عائلتك، او جهة العمل، او غيرهم) لدراسة تخصصك او الحصول على مؤهلك؟ \*

Mark only one oval.

☐ Yes / نعم

☐ No / لا

54. Have society's expectations (such as preferences for specific majors or qualifications) affected your university career / هل اثرت توقعات المجتمع (مثل تفضيل) على اختيارك لتخصصك؟ \*

Mark only one oval.

☐ Yes / نعم

☐ No / لا

55. Did you move to another city to study / هل انتقلت الى مدينة أخرى لغرض الدراسة؟ \*

Mark only one oval.

☐ Yes / نعم

☐ No / لا

56. Do you have many commitments and face difficulties balancing them with your studies / هل لديك التزامات كثيرة وتواجه صعوبات في الموازنة بينها وبين دراستك؟ \*

Mark only one oval.

☐ Yes / نعم

☐ No / لا

57. Are you facing difficulties in covering living expenses (such as food, drink, transportation, and housing) / هل تواجه صعوبات في دفع نفقات المعيشة (مثل الاكل، الشرب، المواصلات، والمسكن)؟ \*

Mark only one oval.

☐ Yes / نعم

☐ No / لا

58. Did you receive enough moral support from your family and friends during your studies / هل تلقيت الدعم المعنوي الكافي من عائلتك واصدقائك خلال فترة دراستك؟ \*

Mark only one oval.

☐ Yes / نعم

☐ No / لا

59. Did you face any psychological issues that affected your academic journey / هل واجهت أي مشاكل (نفسية) اثرت على دراستك؟ \*

Mark only one oval.

☐ Yes / نعم

☐ No / لا

60. Did you face any health issues that affected your academic journey / هل واجهت أي مشاكل (صحية) اثرت على دراستك؟ \*

Mark only one oval.

☐ Yes / نعم

☐ No / لا

61. In your opinion, what are the other reasons for student dropout / برأيك، ماهي الأسباب الأخرى لانسحاب الطلاب؟

This content is neither created nor endorsed by Google.

## Google Forms
