# Supplementary material for: Predicting student dropout in Saudi Universities using machine learning and explainable AI
Source: PeerJ journal article supplement (doi:10.7717/peerj-cs.3490), 2026-01-27
Supplement: Response_Rates_by_University.pdf [file Response_Rates_by_University.pdf]

## Response Rates by University

The following tables present the number of students still studying, graduates, dropouts, and total students across various universities.

Table 1: Response Rates by University

| University Name                                        | Still Studying | Graduates | Dropout | Total Students |
|--------------------------------------------------------|----------------|-----------|---------|----------------|
| King Abdulaziz University                              | 160            | 72        | 76      | 308            |
| Imam Abdulrahman Bin Faisal University                 | 28             | 8         | 51      | 87             |
| Imam Muhammad Ibn Saud Islamic University              | 226            | 35        | 29      | 291            |
| Islamic University of Madinah                          | 1              | 0         | 1       | 2              |
| Jazan University                                       | 69             | 9         | 36      | 114            |
| Al-Jouf University                                     | 95             | 8         | 32      | 135            |
| Jubail Industrial College                              | 37             | 0         | 9       | 46             |
| Yanbu Industrial College                               | 2              | 1         | 2       | 5              |
| University of Jeddah                                   | 131            | 13        | 43      | 187            |
| University of Al Baha                                  | 58             | 2         | 13      | 73             |
| King Abdullah University of Science and Technology     | 10             | 3         | 40      | 53             |
| King Fahd University of Petroleum and Minerals         | 49             | 4         | 41      | 94             |
| King Faisal University                                 | 194            | 34        | 45      | 273            |
| King Khalid University                                 | 48             | 11        | 43      | 102            |
| King Saud Bin Abdulaziz University for Health Sciences | 29             | 3         | 66      | 98             |

Table 2: Cont. Number of Students per University

| <b>University Name</b>                      | <b>Still Studying</b> | <b>Graduates</b> | <b>Dropout</b> | <b>Total Students</b> |
|---------------------------------------------|-----------------------|------------------|----------------|-----------------------|
| King Saud University                        | 217                   | 13               | 55             | 285                   |
| Majmaah University                          | 32                    | 4                | <b>21</b>      | 57                    |
| Northern Border University                  | 65                    | 8                | <b>22</b>      | 95                    |
| Najran University                           | 55                    | 6                | <b>28</b>      | 89                    |
| Princess Nourah bint Abdulrahman University | 129                   | 8                | <b>47</b>      | 184                   |
| Prince Sattam Bin Abdulaziz University      | 124                   | 6                | 34             | 164                   |
| Qassim University                           | 233                   | 30               | 31             | 294                   |
| Saudi Electronic University                 | 18                    | 1                | 16             | 35                    |
| Shaqra University                           | 65                    | 5                | 12             | 82                    |
| Tabuk University                            | 41                    | 1                | 14             | 56                    |
| Taif University                             | 145                   | 23               | 34             | 202                   |
| Taibah University                           | 71                    | 11               | 26             | 108                   |
| Bisha University                            | 55                    | 7                | 16             | 78                    |
| Hail University                             | 72                    | 8                | 36             | 116                   |
| Hafr Al-Batin University                    | 241                   | 27               | 17             | 285                   |
| Umm Al-Qura University                      | 219                   | 75               | 30             | 324                   |
| Private University                          | 126                   | 6                | 31             | 163                   |
| Others                                      | 30                    | 24               | 21             | 75                    |
